# Supplementary material
Source: MDPI journal article supplement (https://www.mdpi.com/2072-4292/14/24/6187)
Supplement: s1 [file s1]

**Table S1:** Coefficient of determination between the individual EVI -based DHIs of the four main taxa. Significant relations: \*\*\*  $p < 0.001$ .

|                           | All DHIs<br>R <sup>2</sup> adj | Cumulative<br>DHI R <sup>2</sup> adj | Minimum DHI<br>R <sup>2</sup> adj | Variation DHI<br>R <sup>2</sup> adj |
|---------------------------|--------------------------------|--------------------------------------|-----------------------------------|-------------------------------------|
| <b>Mammals</b>            | 0.02***                        | 0.00***                              | 0.00***                           | 0.02***                             |
| <b>birds</b>              | 0.09***                        | 0.05***                              | 0.06***                           | 0.02***                             |
| <b>Breeding birds</b>     | 0.07***                        | 0.04***                              | 0.05***                           | 0.02***                             |
| <b>Non-breeding birds</b> | 0.07***                        | 0.04***                              | 0.05***                           | 0.02***                             |

**Table S2:** Coefficient of determination between the individual GPP -based DHIs of the four main taxa. Significant relations: \*\*\*  $p < 0.001$ .

|                           | All DHIs<br>R <sup>2</sup> adj | Cumulative DHI<br>R <sup>2</sup> adj | Minimum DHI<br>R <sup>2</sup> adj | Variation DHI<br>R <sup>2</sup> adj |
|---------------------------|--------------------------------|--------------------------------------|-----------------------------------|-------------------------------------|
| <b>Mammals</b>            | 0.14***                        | 0.13***                              | 0.00***                           | 0.09***                             |
| <b>birds</b>              | 0.24***                        | 0.23***                              | 0.01***                           | 0.16***                             |
| <b>Breeding birds</b>     | 0.24***                        | 0.22***                              | 0.01***                           | 0.15***                             |
| <b>Non-breeding birds</b> | 0.24***                        | 0.22***                              | 0.01***                           | 0.15***                             |

**Table S3:** Coefficient of determination between the individual LAI -based DHIs of the four main taxa. Significant relations: \*\*\*  $p < 0.001$ .

|                           | All DHIs<br>R <sup>2</sup> adj | Cumulative<br>DHI R <sup>2</sup> adj | Minimum<br>DHI R <sup>2</sup> adj | Variation DHI<br>R <sup>2</sup> adj |
|---------------------------|--------------------------------|--------------------------------------|-----------------------------------|-------------------------------------|
| <b>Mammals</b>            | 0.14***                        | 0.12***                              | 0.02***                           | 0.04***                             |
| <b>birds</b>              | 0.33***                        | 0.20***                              | 0.04***                           | 0.06***                             |
| <b>Breeding birds</b>     | 0.23***                        | 0.20***                              | 0.04***                           | 0.06***                             |
| <b>Non-breeding birds</b> | 0.23***                        | 0.20***                              | 0.04***                           | 0.06***                             |

**Table S4:** Coefficient of determination between the individual NDVI -based DHIs of the four main taxa. Significant relations: \*\*\*  $p < 0.001$ .

|                           | All DHIs<br>R <sup>2</sup> adj | Cumulative DHI<br>R <sup>2</sup> adj | Minimum DHI<br>R <sup>2</sup> adj | Variation DHI<br>R <sup>2</sup> adj |
|---------------------------|--------------------------------|--------------------------------------|-----------------------------------|-------------------------------------|
| <b>Mammals</b>            | 0.01***                        | 0.00***                              | 0.00***                           | 0.01***                             |
| <b>birds</b>              | 0.05***                        | 0.02***                              | 0.03***                           | 0.01***                             |
| <b>Breeding birds</b>     | 0.04***                        | 0.02***                              | 0.03***                           | 0.01***                             |
| <b>Non-breeding birds</b> | 0.04***                        | 0.02***                              | 0.03***                           | 0.01***                             |

**Table S5:** Coefficient of determination between the individual NDVI -based DHIs of the four main taxa.

|                           | All DHIs<br>R <sup>2</sup> adj | Cumulative DHI<br>R <sup>2</sup> adj | Minimum DHI<br>R <sup>2</sup> adj | Variation DHI<br>R <sup>2</sup> adj |
|---------------------------|--------------------------------|--------------------------------------|-----------------------------------|-------------------------------------|
| <b>Mammals</b>            | 0.14                           | 0.12                                 | 0.03                              | 0.12                                |
| <b>birds</b>              | 0.25                           | 0.20                                 | 0.04                              | 0.19                                |
| <b>Breeding birds</b>     | 0.24                           | 0.20                                 | 0.05                              | 0.18                                |
| <b>Non-breeding birds</b> | 0.01                           | 0.00                                 | 0.00                              | 0.00                                |
